# Supplementary material for: Preparation of Porous Poly(Styrene-Divinylbenzene) Microspheres and Their Modification with Diazoresin for Mix-Mode HPLC Separations
Source: MDPI journal article supplement (doi:10.3390/ma10040440), 2017-04-22
Supplement: s1 [file s1]

# Supplementary Materials: Preparation of Porous Poly(Styrene-Divinylbenzene) Microspheres and Their Modification with Diazo resin for Mix-Mode HPLC Separations

Bing Yu, Tao Xu, Hailin Cong, Qiaohong Peng and Muhammad Usman

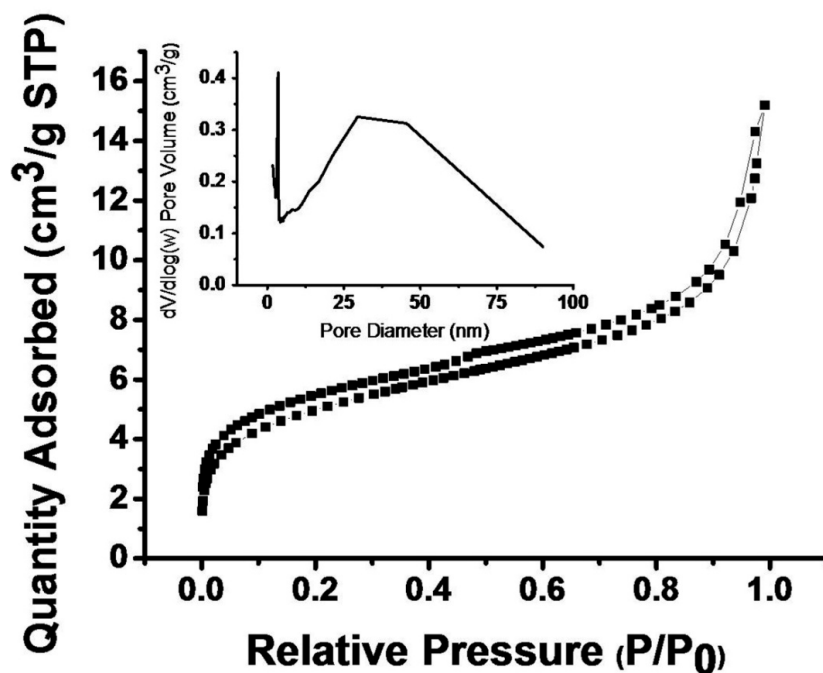

Figure S1. Nitrogen adsorption-desorption isotherms of P(S-DVB)-DR. Inset is the distributions of pore size.

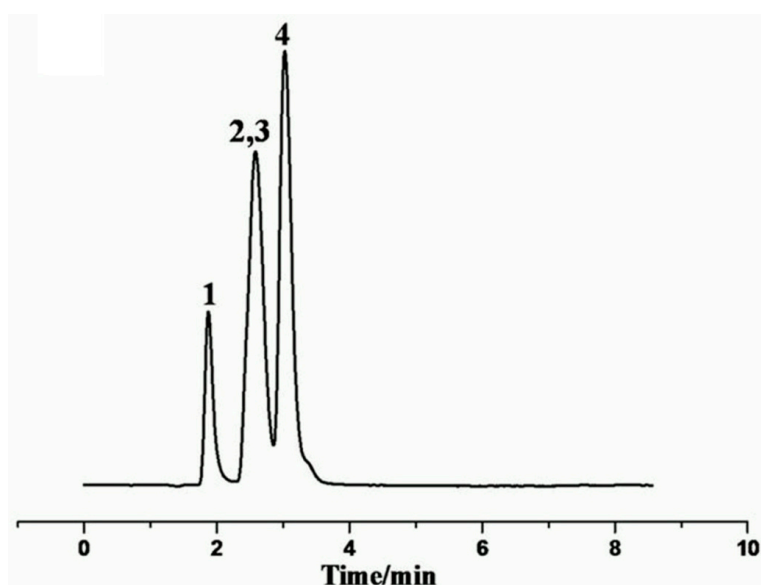

Figure S2. Separation on C18 column for benzene analogues. Column, 75 mm × 4.6 mm I.D.; injection size, 3 μL; mobile phase, methanol.

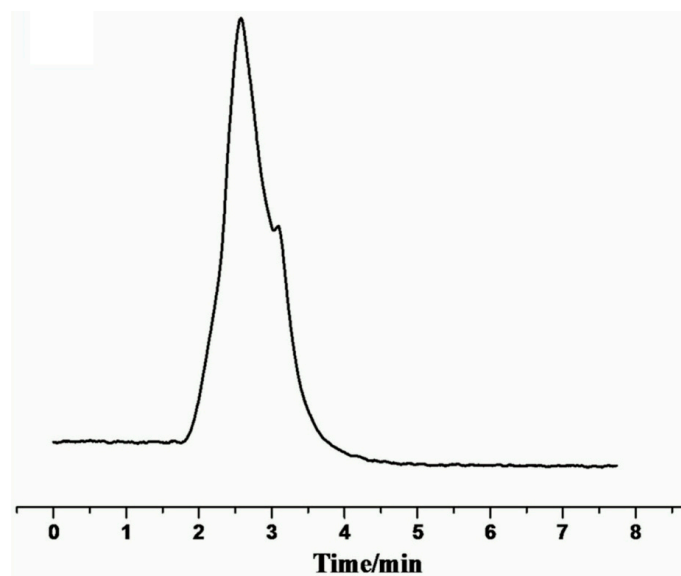

**Figure S3.** Separation on C18 column for organic acids. Column, 75 mm × 4.6 mm I.D.; flow rate, 0.5 ml/min; injection size, 3  $\mu$ L; mobile phase, phosphate buffer (pH = 4) and methanol ( $v/v = 85:15$ ).

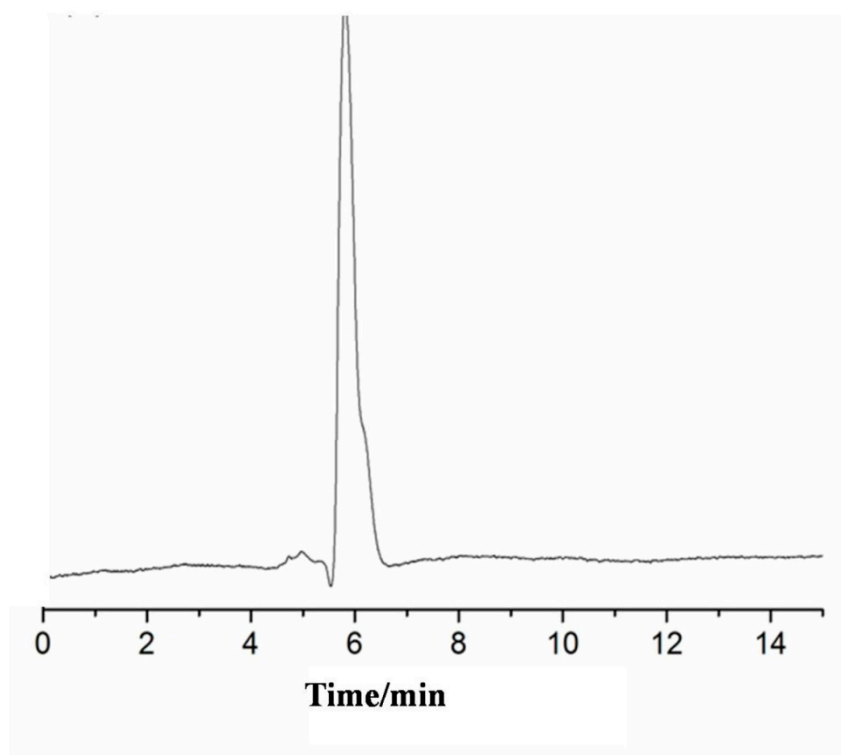

**Figure S4.** Separation on C18 column for C60 and C70: column, 75 mm × 4.6 mm I.D.; injection size, 2  $\mu$ L; flow rate: 0.15 mL/min; mobile phase, hexane and isopropanol ( $v/v = 1:3$ ).

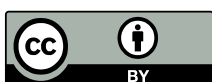

© 2017 by the authors. Submitted for possible open access publication under the terms and conditions of the Creative Commons Attribution (CC-BY) license (<http://creativecommons.org/licenses/by/4.0/>).
